# Supplementary material for: Fidelity Characterization of Highly Pathogenic Porcine Reproductive and Respiratory Syndrome Virus and NADC30-like Strain
Source: MDPI journal article supplement (doi:10.3390/v16050797), 2024-05-16
Supplement: s1 [file s1]

## Supplementary Materials

Table S1. Primers sequence for JXwn06 reverse transcription.

| Name  | Sequence                  | Position    |
|-------|---------------------------|-------------|
| JX1R  | TACTCTTTCAGGAAGGGTGG      | 1575-1556   |
| JX2R  | AGGTGTTCGGTTGTCTGATT      | 2253-2233   |
| JX3R  | CGATGATGGCTTGAGCTGAGTAT   | 3178-3156   |
| JX4R  | GGCGATCTCATTAGGAGCAGTT    | 4329-4308   |
| JX5R  | ACGGTGTTTCAGTGAGGGCTTT    | 5564-5544   |
| JX6R  | AAGGAAATCCAAGTCCTCGTC     | 6750-6730   |
| JX7R  | CCAAAGCGTGCCATCAATCCC     | 7922-7902   |
| JX8R  | GTCTTCTTTGGGTCCGTCTGG     | 9226-9206   |
| JX9R  | CAAATACATAGCAATGGGAGTCAAA | 10323-10299 |
| JX10R | AACTCGGATGTATGAGGCGTAG    | 11573-11552 |
| JX11R | AAAGCGGGCATACCGTGTAAT     | 12774-12754 |
| JX12R | TGTTGTTGTTGCTGGCGTTGA     | 13803-13783 |
| JX13R | TTTGCTGCTTGCCGTTGTTAT     | 14826-14806 |
| JX14R | AATTACGGCCGCATGGTTCT      | 15320-15301 |

\*R: reverse primer

Table S2. Primers sequence for CHsx1401 reverse transcription.

| Name  | Sequence                       | Position    |
|-------|--------------------------------|-------------|
| SX1R  | CACTCTTTCGGGAAGGGTGG           | 1578-1559   |
| SX2R  | CAGTCCTGCGCGGTGCGGGGACAG       | 2539-2516   |
| SX3R  | CAATGATGGCTTGAGCTGAGTAT        | 2878-2856   |
| SX4R  | AGCGACCTCGCTGGGGGCGGTT         | 4029-4008   |
| SX5R  | AACACTCCACCGGAGCCCATGGAGG      | 5303-5279   |
| SX6R  | TTTCGCAAGGAAATCCAAGTCTTC       | 6456-6433   |
| SX7R  | CCAAAGCGTGCCATCGATCCC          | 7622-7602   |
| SX8R  | GTCTTCTTTGGGTCCGTCTGA          | 8926-8906   |
| SX9R  | CAAAGACATAGCAGTGAGAGTCAAA      | 10023-9999  |
| SX10R | AACTCGGATGTACGATGCATAA         | 11273-11252 |
| SX11R | AAGGCGGGCACACCGTATAAT          | 12474-12454 |
| SX12R | TGCTGTGGTTGTTGGCGCTGA          | 13503-13483 |
| SX13R | TTTGCTGTCTGCCGTTGTTAT          | 14526-14506 |
| SX14R | AATTCGGCCCATGGTTCTCGCCAATTAAAT | 15021-14990 |

\*R: reverse primer
